# Supplementary material
Source: PubMed Central journal article supplement (PMC9968410)
Supplement: NIHMS1869412-supplement-2.pdf [file NIHMS1869412-supplement-2.pdf]

# Supplemental Figures

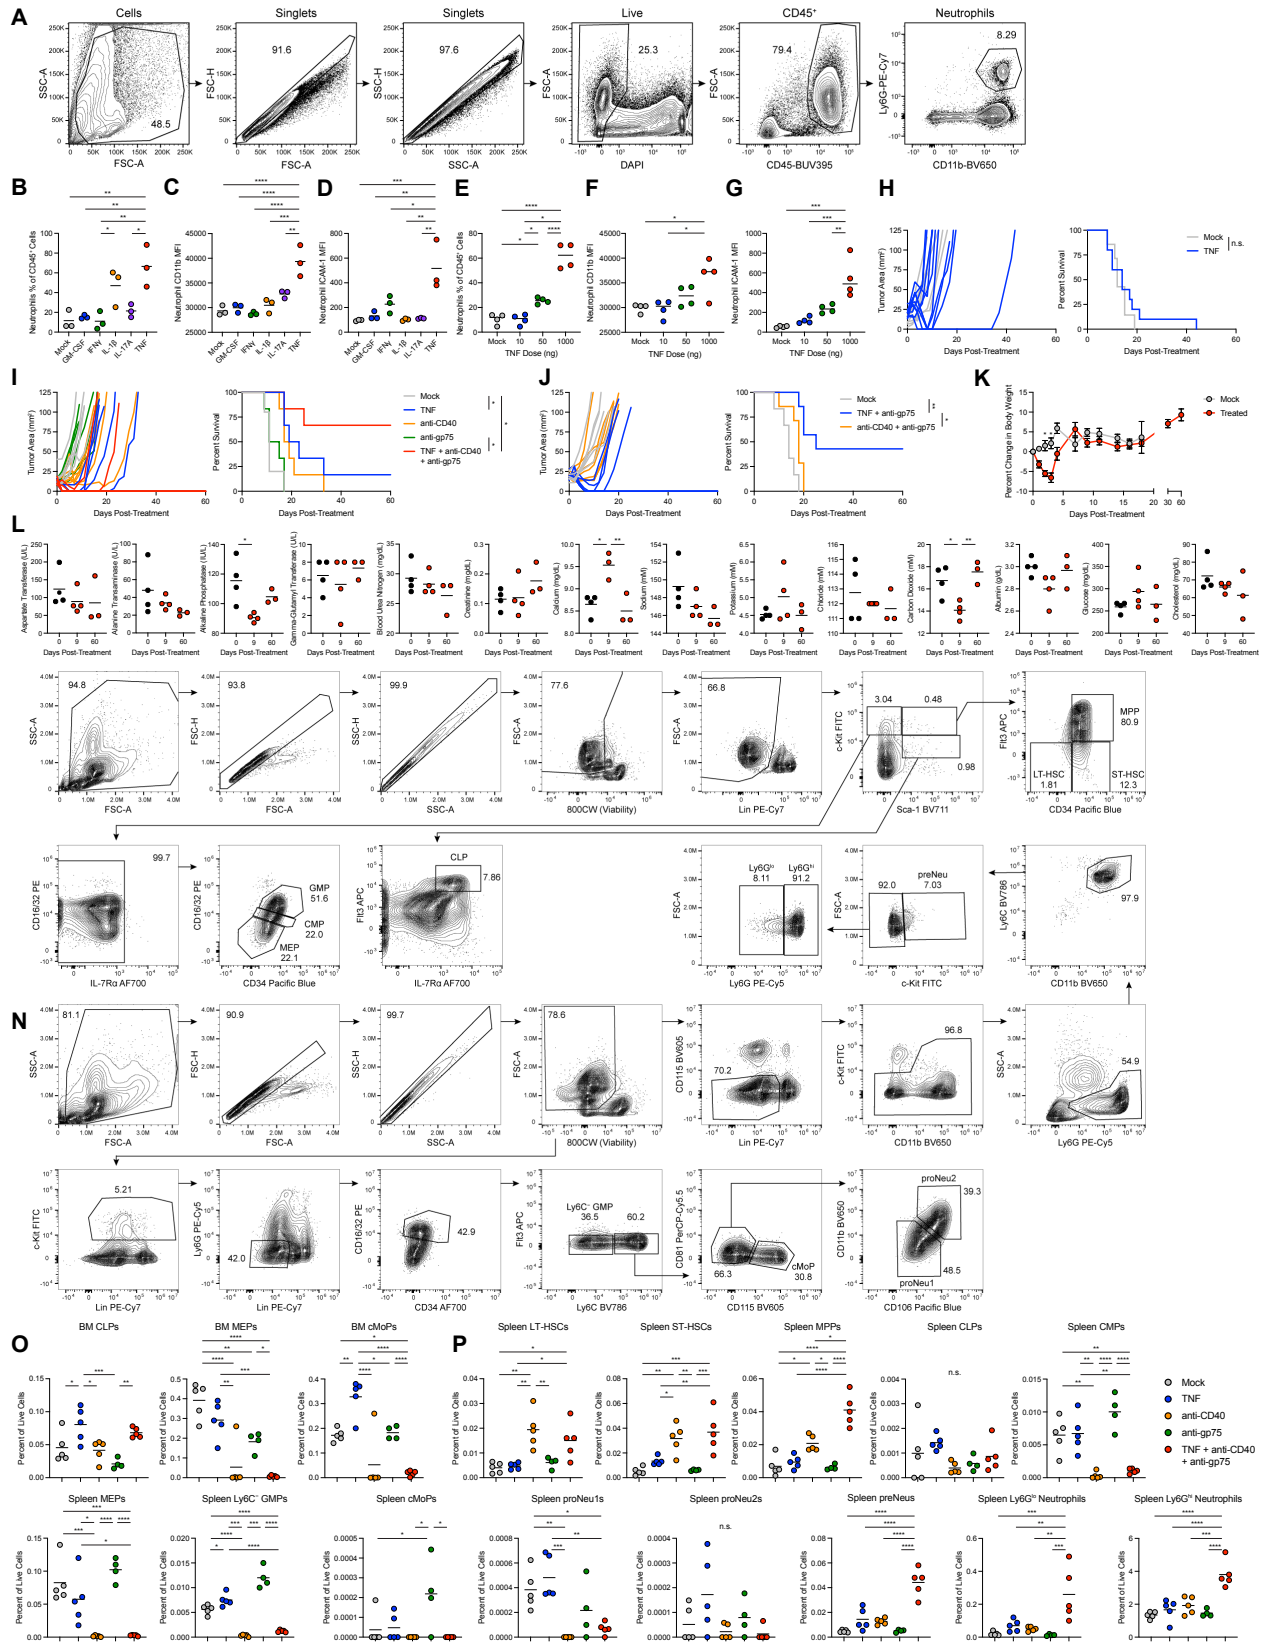

**Figure S1: Neutrophil-activating therapy induces neutrophil expansion and recruitment to tumors.** Related to Figure 1.

(A) Flow cytometry gating strategy for neutrophils. (B) Neutrophil infiltration of B16 tumors 24 hours after treatment with the indicated cytokines (n=3). (C-D) Expression of CD11b (C) and ICAM-1 (D) on tumor-infiltrating neutrophils 24 hours after administration of the indicated cytokines (n=3). (E) Neutrophil infiltration of B16 tumors 24 hours after treatment with the indicated dose of TNF (n=4). (F-G) Expression of CD11b (C) and ICAM-1 (D) on tumor-infiltrating neutrophils 24 hours after administration of the indicated dose of TNF (n=4). (H) Survival of B16-bearing mice following treatment with 1  $\mu$ g TNF (mock n=7, TNF n=10). (I-J) Survival of B16-bearing mice treated with the indicated factors (I: mock n=5, others n=6; J: mock n=6, others n=7). (K) Percent change in mouse body weight following treatment of B16 tumors (n=5, mean +/- SEM shown). (L) Mouse blood chemistry values obtained on the indicated days after treatment of B16 tumors with neutrophil-activating therapy (d60 n=3, others n=4). (M-N) Flow cytometry gating strategies to identify hematopoietic stem cells, progenitors, and neutrophil precursors. (O-P) Frequencies of hematopoietic stem cells, progenitors, and precursor populations in the bone marrow (O) and spleen (P) 24 hours after treatment of B16 with neutrophil-activating therapy (anti-gp75 n=4, others n=5). Statistics: One-way ANOVA with Tukey's multiple comparisons test (B-G, L, O-P), Log-rank test (H), Log-rank test with Bonferroni correction (I-J), Two-way ANOVA with Sidak's multiple comparisons test (K). For all dot plots, the line indicates the mean. Data are representative of 2 (B-G, I-J, O-P) or 1 (K-L) independent experiments or pooled from 4 experiments (H).

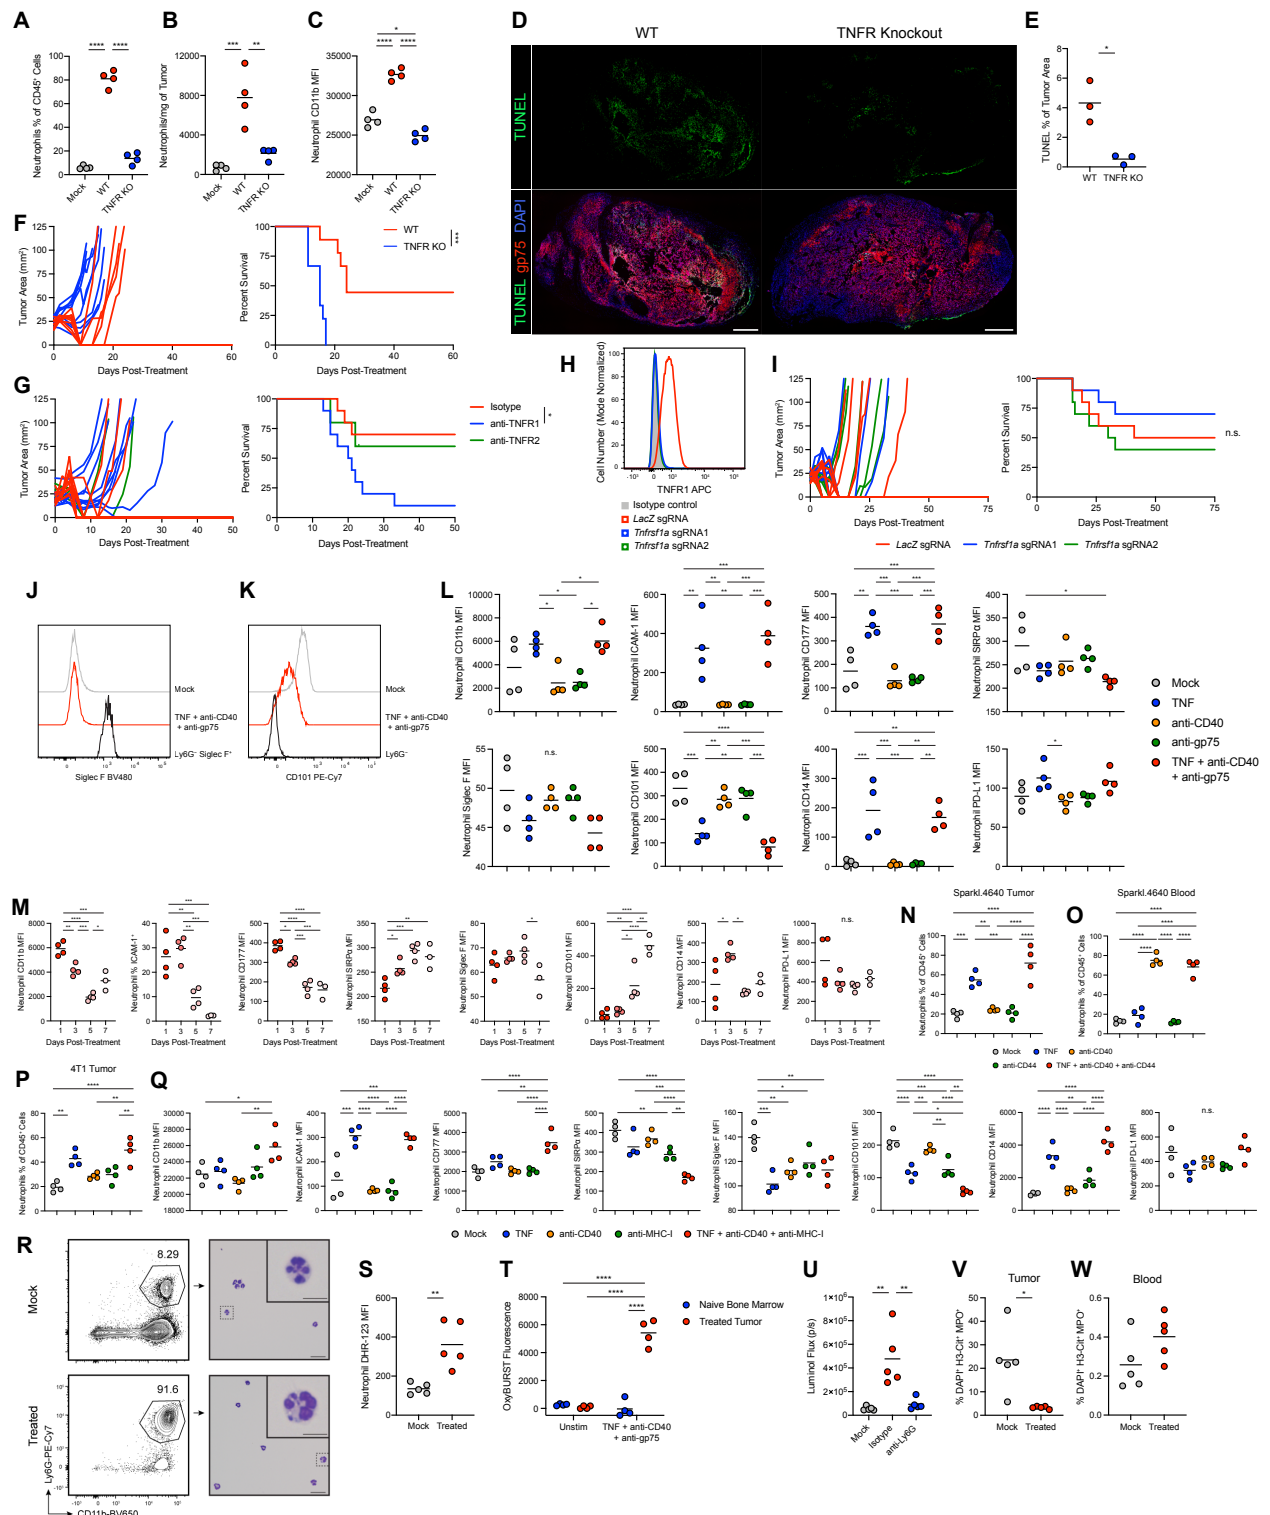

**Figure S2: Therapy induces neutrophil activation.** Related to Figure 1.

(A-B) Tumor-infiltrating neutrophil frequency of CD45<sup>+</sup> cells (A) and numbers/mg of tumor (B) 24 hours after treatment of B16 tumors with neutrophil-activating therapy in wild-type (WT) or TNF receptor knockout (TNFR KO) mice (n=4). (C) CD11b expression on tumor-infiltrating

neutrophils 4 hours after treatment of B16 tumors with neutrophil-activating therapy in WT or TNFR KO mice (n=4). **(D-E)** Representative immunofluorescence (D) and quantification (E) of TUNEL staining in B16 tumors in WT or TNFR KO mice 24 hours after treatment with neutrophil-activating therapy. Scale bars = 500  $\mu$ m. (n=3) **(F)** Survival of B16-bearing WT or TNFR KO mice treated with neutrophil-activating therapy (n=9). **(G)** Survival of B16-bearing mice treated with neutrophil-activating therapy following administration of TNFR blocking antibodies (TNFR2 n=5, others n=10). **(H)** TNFR1 staining of B16 cells following knockout of TNFR1 with CRISPR-Cas9 sgRNA targeting *Tnfrsf1a* or the irrelevant *LacZ*. **(I)** Survival of mice bearing TNFR1-knockout B16 following treatment with neutrophil-activating therapy (n=10). **(J)** Representative histograms comparing Siglec F expression in mock or treated tumor-infiltrating neutrophils to a Siglec F expression in Ly6G<sup>-</sup> Siglec F<sup>+</sup> cell population in the tumor of mock-treated mice, 4 hours after treatment. **(K)** Representative histograms comparing the expression level of CD101 in mock or treated tumor-infiltrating neutrophils to that of Ly6G<sup>-</sup> cells in the tumor of mock-treated mice, 4 hours after treatment. **(L)** Surface marker expression on neutrophils in the blood 4 hours after treatment of B16 tumors with the indicated components (n=4). **(M)** Surface marker expression on neutrophils in the blood at the indicated times post-treatment with the full neutrophil-activating therapy (d7 n=3, others n=4). **(N-O)** Neutrophil frequency in the tumor (N) and blood (O) 24 hours after treatment of Sparkl.4640 with neutrophil-activating therapy (n=4). **(P)** Neutrophil frequency in 4T1 tumors 24 hours after therapy (n=4). **(Q)** Surface marker expression on neutrophils in 4T1 tumors 4 hours after treatment with the indicated components (n=4). **(R)** Representative flow cytometry staining of CD11b<sup>+</sup>Ly6G<sup>+</sup> cells, gated on single/live/CD45<sup>+</sup> cells (left panels), and May-Grünwald-Giemsa staining of sorted CD45<sup>+</sup>CD11b<sup>+</sup>Ly6G<sup>+</sup> cells (right panels), in B16 tumors 24 hours after treatment with neutrophil-activating therapy. Image scale bars = 30  $\mu$ m. Inset scale bars = 10  $\mu$ m. **(S)** Tumor-infiltrating neutrophil MFI of the ROS-sensing dye dihydrorhodamine-123 (DHR-123) 4 hours after treatment with neutrophil-activating therapy (n=5). **(T)** Fluorescence of OxyBURST Green H<sub>2</sub>HFF BSA following *in vitro* stimulation of neutrophils isolated from treated tumors or naïve bone marrow with neutrophil-activating therapy (n=4). **(U)** Bioluminescence in the tumor emitted from the ROS-sensing molecule luminol during *in vivo* imaging 4 hours after treatment of B16 with neutrophil-activating therapy (n=5). **(V-W)** Percentage of neutrophils staining triple positive for DAPI, citrullinated histone H3 (H3-Cit), and myeloperoxidase (MPO) in the tumor (V) and blood (W) of mice treated with neutrophil-activating therapy (n=5). Statistics: One-way ANOVA with Tukey's multiple comparisons test (A-E, L-Q, U), Log-rank test (F), Log-rank test with Bonferroni correction (G, I), Unpaired two-tailed t test (S, V-W), Two-way ANOVA with Tukey's

multiple comparisons test (T). For all dot plots, the line indicates the mean. Data are representative of 3 (F, S), 2 (A-E, H, J-P, R, T, U-W) or 1 (Q) independent experiments or pooled from 2 experiments (G, I).

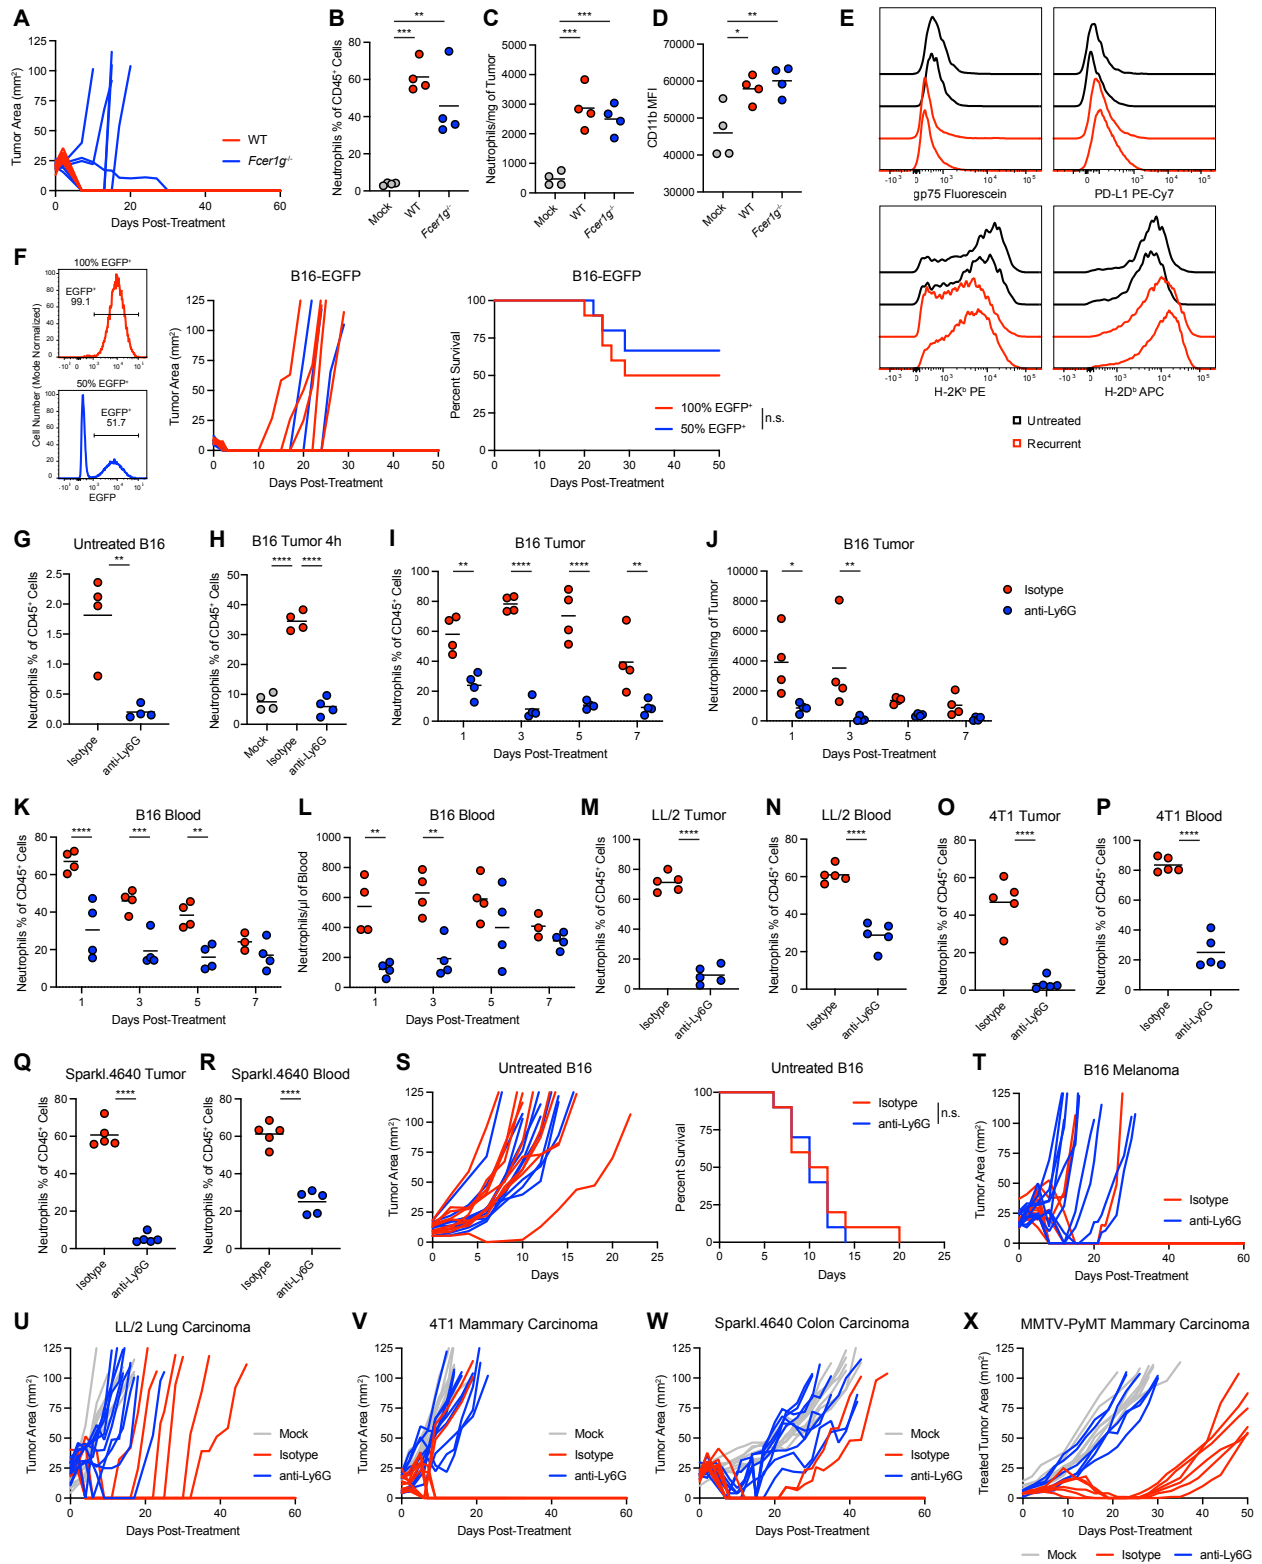

**Figure S3: Neutrophil depletion prevents tumor clearance. Related to Figure 2.**

**(A)** Tumor growth in WT and *Fcer1g*<sup>-/-</sup> B16-bearing mice after treatment with neutrophil-activating therapy (n=10). **(B-D)** Neutrophil frequency (B), numbers (C), and CD11b expression (D) in WT versus *Fcer1g*<sup>-/-</sup> mice, 24 hours after treatment (n=4). **(E)** Expression of gp75, PD-L1, and MHCII molecules on B16 tumor cells from day 0 untreated tumors or tumors that recurred following neutrophil-activating therapy. **(F)** Tumor growth and survival of mice implanted with B16 tumors, in which either 50% or 100% of the B16 cells expressed EGFP on the surface, following treatment with TNF + anti-CD40 + anti-EGFP (n=10). **(G)** Neutrophil frequency in untreated B16 tumors in mice administered anti-Ly6G or isotype control (n=4). **(H)** Neutrophil frequency in B16 tumors 4 hours after treatment with neutrophil-activating therapy in mice administered anti-Ly6G or isotype control (n=4). **(I-L)** Neutrophil frequencies (I, K) and numbers (J, L) in the tumor (I-J) and blood (K-L) of B16-bearing mice at multiple time points after our Ly6G depletion plus neutrophil-activating therapy protocol (n=4). **(M-R)** Neutrophil frequency in the tumor (M, O, Q) and blood (N, P, R) 24 hours after neutrophil-activating treatment of Ly6G-depleted mice bearing LL/2 (M-N), 4T1 (O-P), and Sparkl.4640 (Q-R) tumors. (n=5) **(S)** B16 tumor growth and survival of mice receiving anti-Ly6G or isotype control in the absence of neutrophil-activating therapy (n=10). **(T-W)** Tumor growth in mice bearing B16 (T) (n=10), LL/2 (U) (mock n=8, others n=10), 4T1 (V) (n=10), or Sparkl.4640 (W) (mock n=8, isotype n=10, anti-Ly6G n=9) tumors that received anti-Ly6G or isotype control prior to neutrophil-activating therapy or mock treatment. **(X)** Growth of the treated tumor in MMTV-PyMT mice administered anti-Ly6G or isotype control prior to neutrophil-activating therapy. Isotype control mice were euthanized at day 50 due to tumor burden in distant untreated breasts. (mock n=8, others n=6)

Statistics: One-way ANOVA with Tukey's multiple comparisons test (B-D, H), Log-rank test (F, S), Unpaired two-tailed t test (G, M-R), Two-way ANOVA with Tukey's multiple comparisons test (I-L). For all dot plots, the line indicates the mean. Data are representative of 3 (T), 2 (A-D), or 1 (E-S) independent experiments or pooled from 3 (U-W) or 6 (X) experiments.

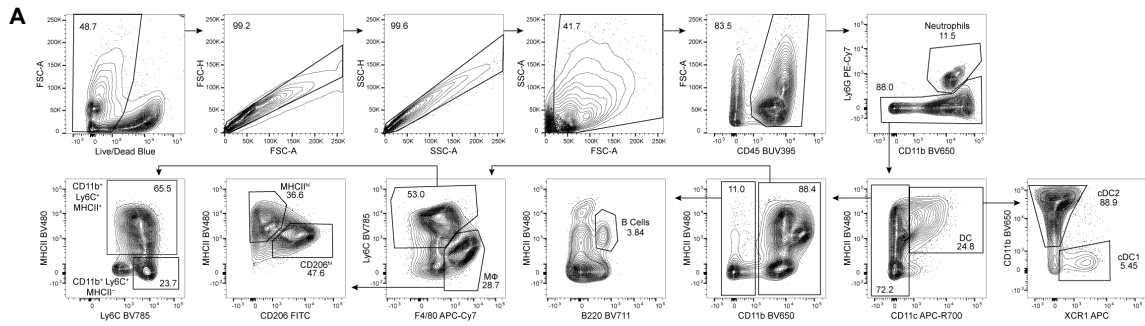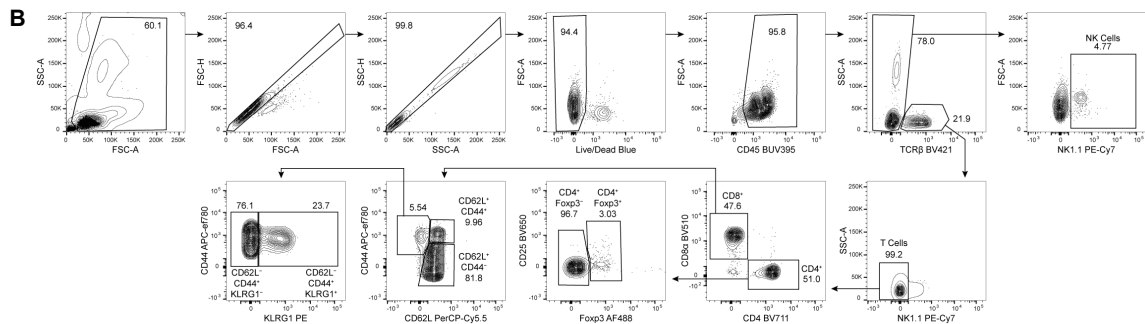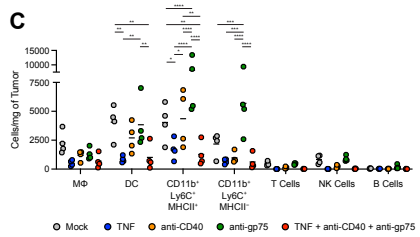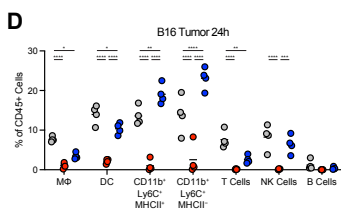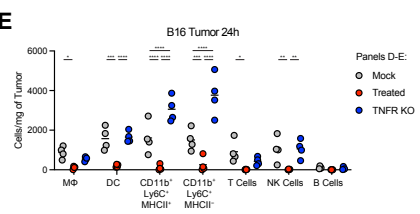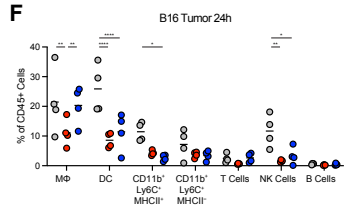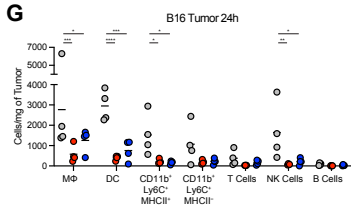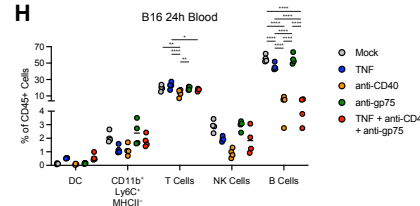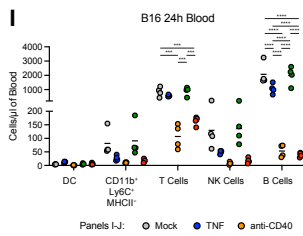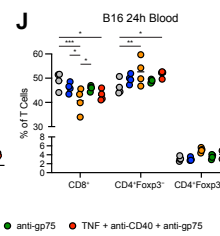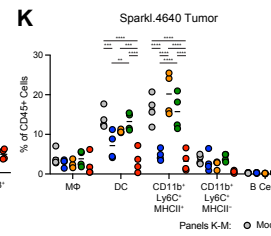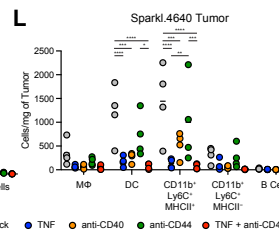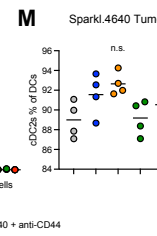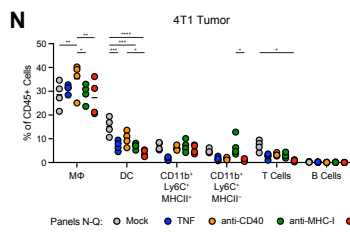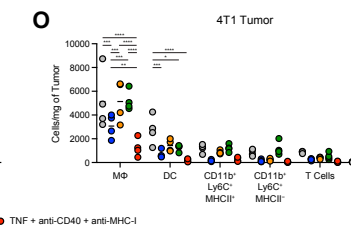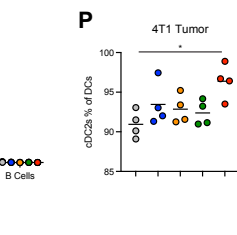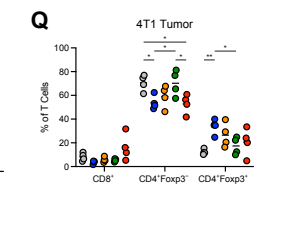



**Figure S4: Impact of neutrophil-activating therapy on the numbers and frequencies of other immune cells.** Related to Figure 3.

(A-B) Flow cytometry gating strategy for identifying myeloid and lymphoid subsets. CD4<sup>+</sup>Foxp3<sup>-</sup> T cells were gated for memory and effector phenotype in the same manner as the CD8<sup>+</sup> T cells shown. (C) Numbers of other immune cells in B16 tumors 24 hours after treatment with the indicated components (n=4). (D-E) Frequencies (D) and numbers (E) of immune cells in B16 tumors 24 hours after treatment of WT or TNFR KO mice with the full neutrophil-activating therapy (n=4). (F-G) Frequencies (F) and numbers (G) of immune cells in B16 tumors 24 hours after treatment of WT or *Fcer1g*<sup>-/-</sup> mice with the full neutrophil-activating therapy (n=4). (H-I) Frequencies (H) and numbers (I) of immune cells in the blood of B16-bearing mice 24 hours after treatment with the indicated components (n=4). (J) Frequencies of T cell subsets as a percentage of total T cells in the blood 24 hours after treatment of B16 tumors with the indicated components (n=4). (K-L) Frequencies (K) and numbers (L) of immune cells in Sparkl.4640 tumors 24 hours after treatment with the indicated components (n=4). (M) Percent of CD11b<sup>+</sup> cDC2s out of total DCs in Sparkl.4640 tumors 24 hours after treatment (n=4). (N-O) Frequencies (N) and numbers (O) of immune cells in 4T1 tumors 24 hours after treatment with the indicated components (n=4). (P) Percent of CD11b<sup>+</sup> cDC2s out of total DCs in 4T1 tumors 24 hours after treatment (n=4). (Q) Percent of T cell subsets out of total T cells in 4T1 tumors 24 hours after treatment (n=4). Statistics: Two-way ANOVA with Tukey's multiple comparisons test (C-L, N-O, Q), One-way ANOVA with Tukey's multiple comparisons test (M, P). For all dot plots, the line indicates the mean. Data are representative of 2 (C-J) or 1 (K-Q) independent experiments.

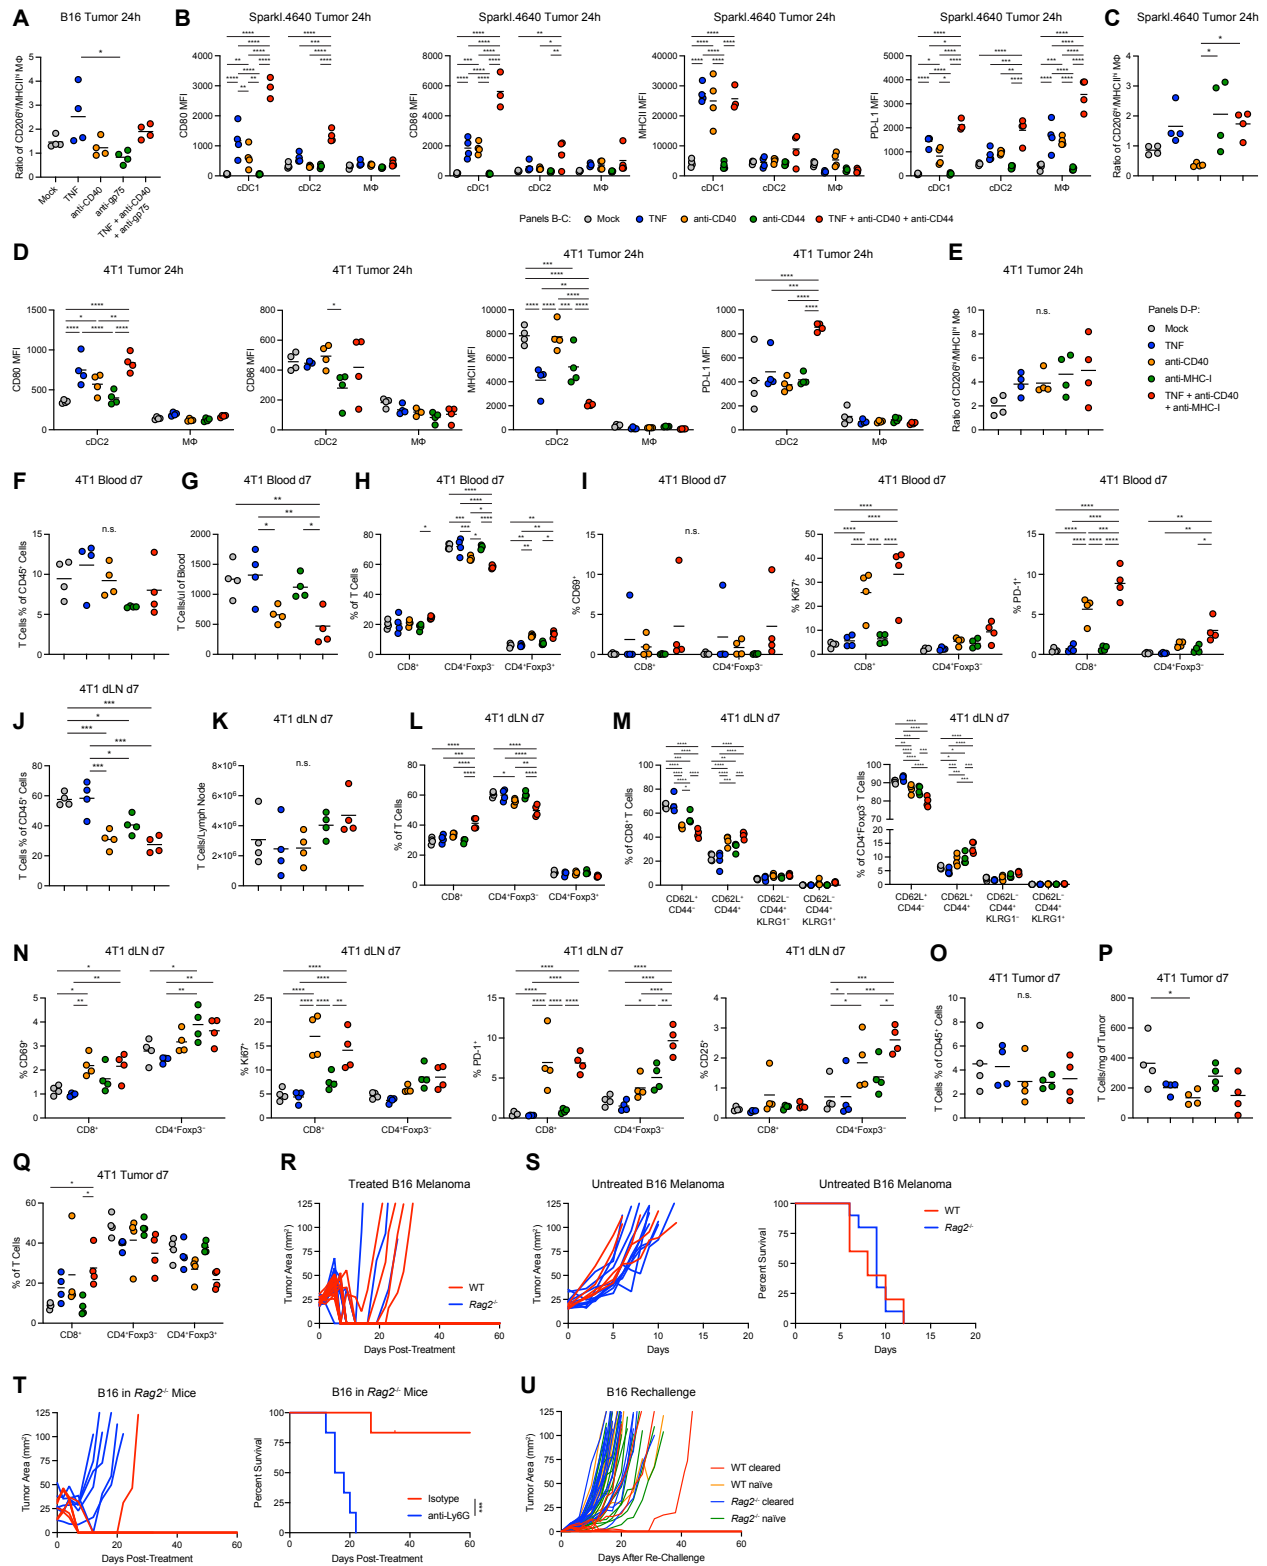

**Figure S5: Activation and priming of immune cells induced by neutrophil-activating therapy. Related to Figure 3.**

(A) Ratio of CD206<sup>hi</sup> to MHCII<sup>hi</sup> macrophages in B16 tumors 24 hours after treatment with the indicated components (n=4). (B) Expression of activation markers on APC populations in Sparkl.4640 tumors 24 hours after treatment with the indicated components (n=4). (C) Ratio of CD206<sup>hi</sup> to MHCII<sup>hi</sup> macrophages in Sparkl.4640 tumors 24 hours after treatment with the indicated components (n=4). (D) Expression of activation markers on APC populations in 4T1 tumors 24 hours after treatment with the indicated components (n=4). (E) Ratio of CD206<sup>hi</sup> to MHCII<sup>hi</sup> macrophages in 4T1 tumors 24 hours after treatment with the indicated components (n=4). (F-G) Frequencies (F) and numbers (G) of total T cells in the blood 7 days after treatment of 4T1 (n=4). (H) Percent of T cell subsets out of total T cells in the blood 7 days after treatment of 4T1 (n=4). (I) Expression of markers on T cell subsets in the blood 7 days after treatment of 4T1 (n=4). (J-K) Frequencies (J) and numbers (K) of total T cells in the tumor-draining lymph node (dLN) 7 days after treatment of 4T1 (n=4). (L) Percent of T cell subsets out of total T cells in the dLN 7 days after treatment of 4T1 (n=4). (M) Memory and effector phenotypes of T cell subsets in the dLN 7 days after treatment of 4T1 (n=4). (N) Expression of markers on T cell subsets in the dLN 7 days after treatment of 4T1 (n=4). (O-P) Frequencies (O) and numbers (P) of total T cells in the tumor 7 days after treatment of 4T1 (n=4). (Q) Percent of T cell subsets out of total T cells in the tumor 7 days after treatment of 4T1 (n=4). (R) Growth of B16 in WT or *Rag2*<sup>-/-</sup> mice following treatment with neutrophil-activating therapy (n=15). (S) Growth of B16 in untreated WT or *Rag2*<sup>-/-</sup> mice (WT n=5, *Rag2*<sup>-/-</sup> n=10). (T) Tumor growth and survival of B16-bearing *Rag2*<sup>-/-</sup> mice treated with neutrophil-activating therapy after administration of anti-Ly6G or isotype control (n=6). (U) Growth of B16 implanted in tumor-naïve or B16-cleared WT or *Rag2*<sup>-/-</sup> mice 50 days after initial treatment with neutrophil-activating therapy (WT cleared n=14, *Rag2*<sup>-/-</sup> cleared n=18, WT naïve n=10, *Rag2*<sup>-/-</sup> naïve n=15). Statistics: One-way ANOVA with Tukey's multiple comparisons test (A, C, E-G, J-K, O-P), Two-way ANOVA with Tukey's multiple comparisons test (B, D, H-I, L-N, Q), Log-rank test (S-T). For all dot plots, the line indicates the mean. Data are representative of 3 (R), 2 (A, U), or 1 (B-Q, T) independent experiments or pooled from 2 experiments (S).

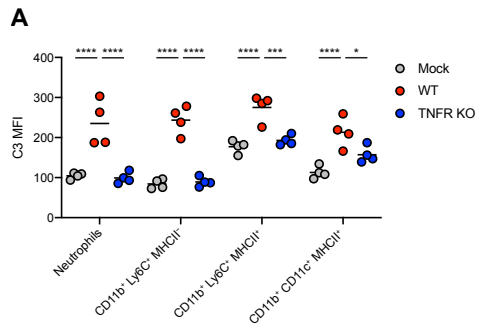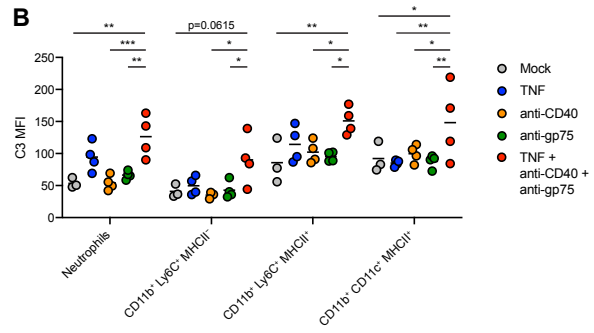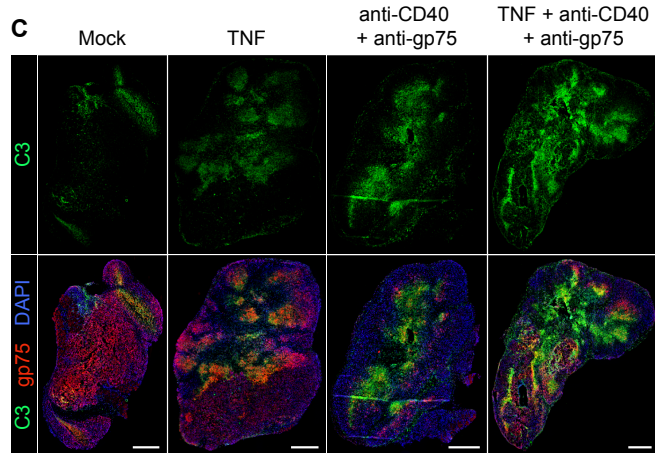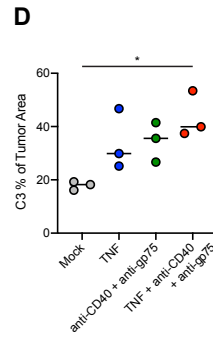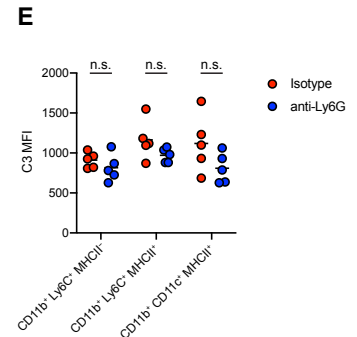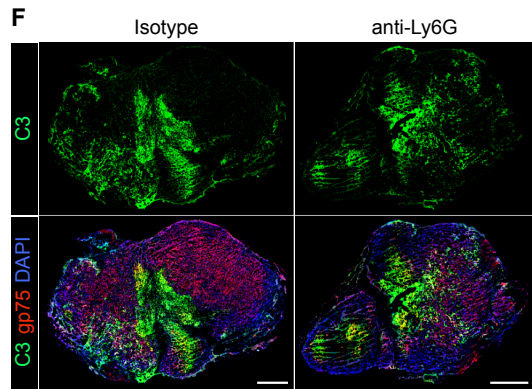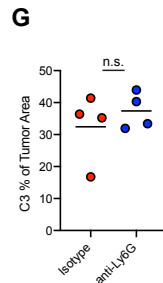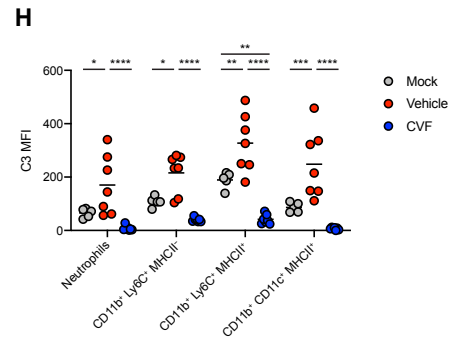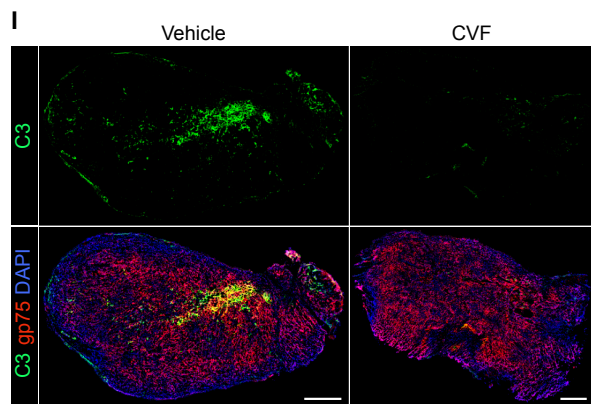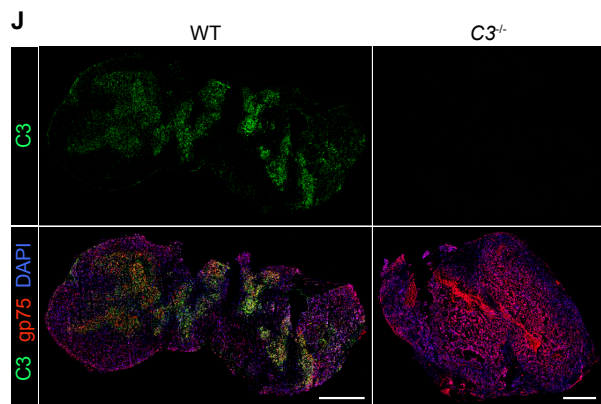

**Figure S6: Complement activation is induced by neutrophil-activating therapy.** Related to Figure 4.

(A) MFI of C3 deposition on myeloid cell populations in B16 tumors 4 hours after treatment of WT or TNFR KO mice with neutrophil-activating therapy (n=4). (B) MFI of C3 deposition on myeloid cell populations in B16 tumors 4 hours after treatment with the indicated components (n=4). (C-D) Representative immunofluorescence (D) and quantification (E) of C3 staining in B16 tumors 4 hours after treatment with the indicated components. Scale bars = 500  $\mu\text{m}$ . (n=3) (E) MFI of C3 deposition on myeloid cell populations in B16 tumors 4 hours after treatment of Ly6G-depleted mice with neutrophil-activating therapy (n=5). (F-G) Representative immunofluorescence (F) and quantification (G) of C3 staining in B16 tumors 4 hours after treatment following Ly6G depletion. Scale bars = 500  $\mu\text{m}$ . (n=4) (H) MFI of C3 deposition on myeloid cell populations in B16 tumors 4 hours after neutrophil-activating therapy following complement depletion by CVF (mock n=5, others n=7). (I) Representative immunofluorescence of C3 staining in B16 tumors 4 hours after neutrophil-activating therapy following administration of CVF. Scale bars = 500  $\mu\text{m}$ . (J) Representative immunofluorescence of C3 staining in B16 tumors 4 hours after treatment of WT or  $C3^{-/-}$  mice. Scale bars = 500  $\mu\text{m}$ . Statistics: Two-way ANOVA with Tukey's multiple comparisons test (A-B, E, H), One-way ANOVA with Tukey's multiple comparisons test (D, G). For all dot plots, the line indicates the mean. Data are representative of 3 (I), 2 (B, E-G), or 1 (A, C-D, J) independent experiments or pooled from 2 experiments (H).

**A**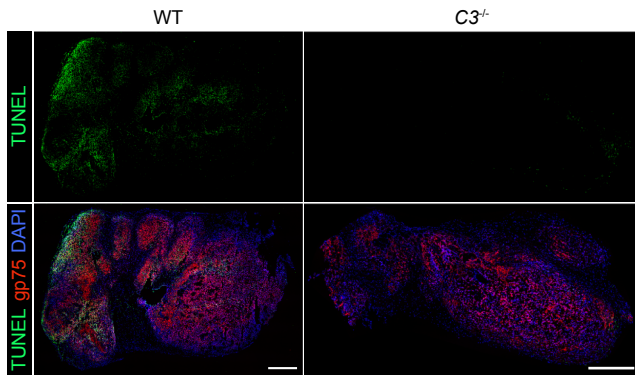**B**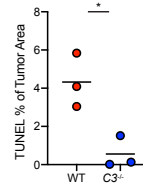**C**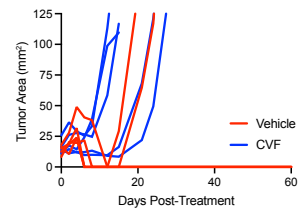**D**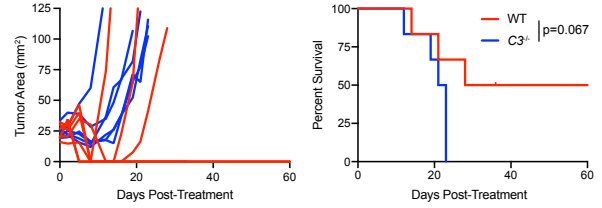**E**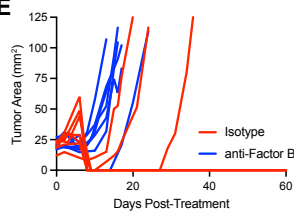**F**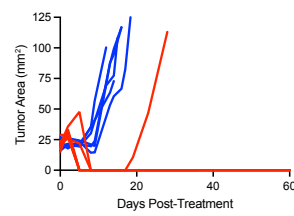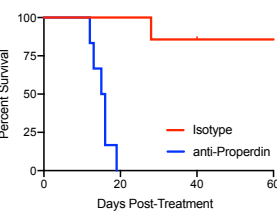**G**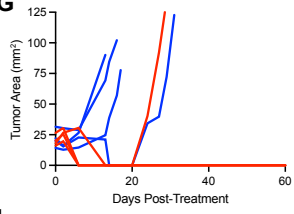**H**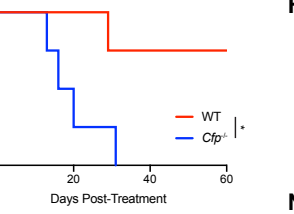**I**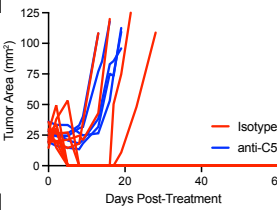**J**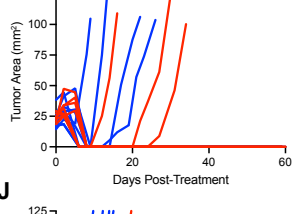**K**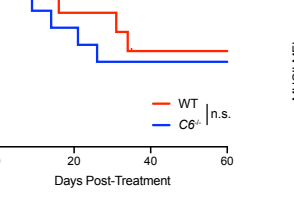**L**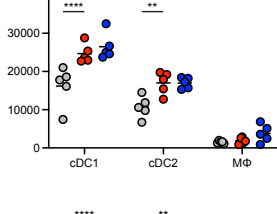**M**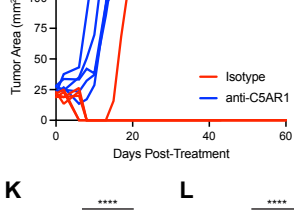**N**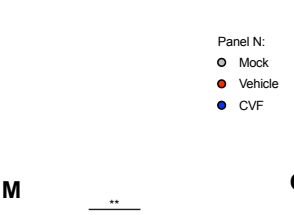**O**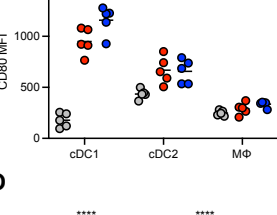**P**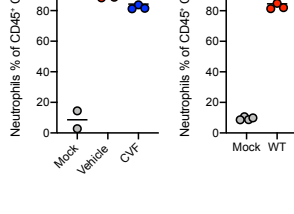**Q**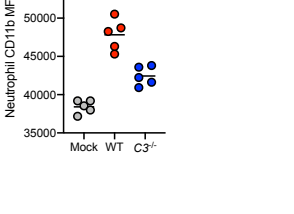**R**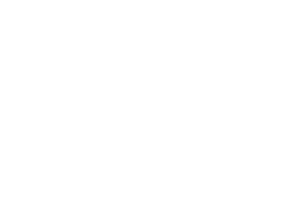**S****T**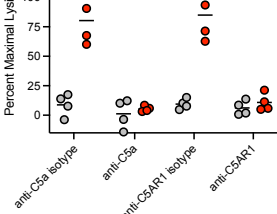**U**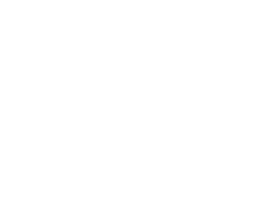**V**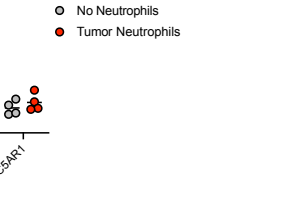**W**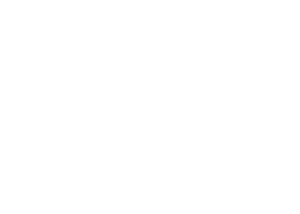

Panel N:  
 ○ Mock  
 ● Vehicle  
 ● CVF

○ No Neutrophils  
 ● Tumor Neutrophils

**Figure S7: The alternative complement pathway induces neutrophil activation through C5a.** Related to Figure 4.

(A-B) Representative immunofluorescence (A) and quantification (B) of TUNEL staining in B16 tumors 24 hours after treatment of WT or  $C3^{-/-}$  mice. Scale bars = 500  $\mu\text{m}$ . (n=3) (C) Growth of B16 tumors in mice depleted of complement with Cobra Venom Factor (CVF) prior to treatment with neutrophil-activating therapy (n=5). (D) Tumor growth and survival of B16-bearing WT or  $C3^{-/-}$  mice following treatment with neutrophil-activating therapy (n=6). (E) Growth of B16 in mice treated following administration of anti-Factor B (n=7). (F) Tumor growth and survival of B16-bearing mice treated with neutrophil-activating therapy following administration of a blocking antibody targeting properdin (isotype n=7, anti-properdin n=6). (G) Tumor growth and survival of B16-bearing WT or  $Cfp^{-/-}$  mice following treatment with neutrophil-activating therapy (n=4). (H) Growth of B16 in mice treated with neutrophil-activating therapy following administration of anti-C5 (mock n=12, anti-C5 n=5). (I) Tumor growth and survival of B16-bearing WT or  $C6^{-/-}$  mice following neutrophil-activating therapy (WT n=8,  $C6^{-/-}$  n=9). (J) Growth of B16 in mice treated following administration of anti-C5AR1 (n=5). (K) Frequency of B16 tumor-infiltrating neutrophils 24 hours after treatment with neutrophil-activating therapy following CVF administration (mock n=2, others n=4). (L) Frequency of B16 tumor-infiltrating neutrophils 24 hours after treatment of WT or  $C3^{-/-}$  mice with neutrophil-activating therapy (n=4). (M) MFI of CD11b on B16 tumor-infiltrating neutrophils in  $C3^{-/-}$  mice 4 hours after neutrophil-activating therapy (n=4). (N) Activation marker expression on tumor APCs 4 hours after treatment of complement-depleted mice with neutrophil-activating therapy (n=5). (O) Percent lysis of B16 cells co-cultured with neutrophils isolated from treated tumors, stimulated *in vitro* with TNF + anti-CD40 + anti-gp75 in active serum in the presence of blocking antibodies targeting C5a, C5AR1, or isotype controls. Asterisks indicate significance relative to the six samples without elevated levels of lysis (n=4). Statistics: One-way ANOVA with Tukey's multiple comparisons test (B, K-M), Log-rank test (D, F-G, I), Two-way ANOVA with Tukey's multiple comparisons test (N-O). For all dot plots, the line indicates the mean. Data are representative of 2 (C-E, J-O) or 1 (A-B, G) independent experiments or pooled from 2 experiments (F, H-I).

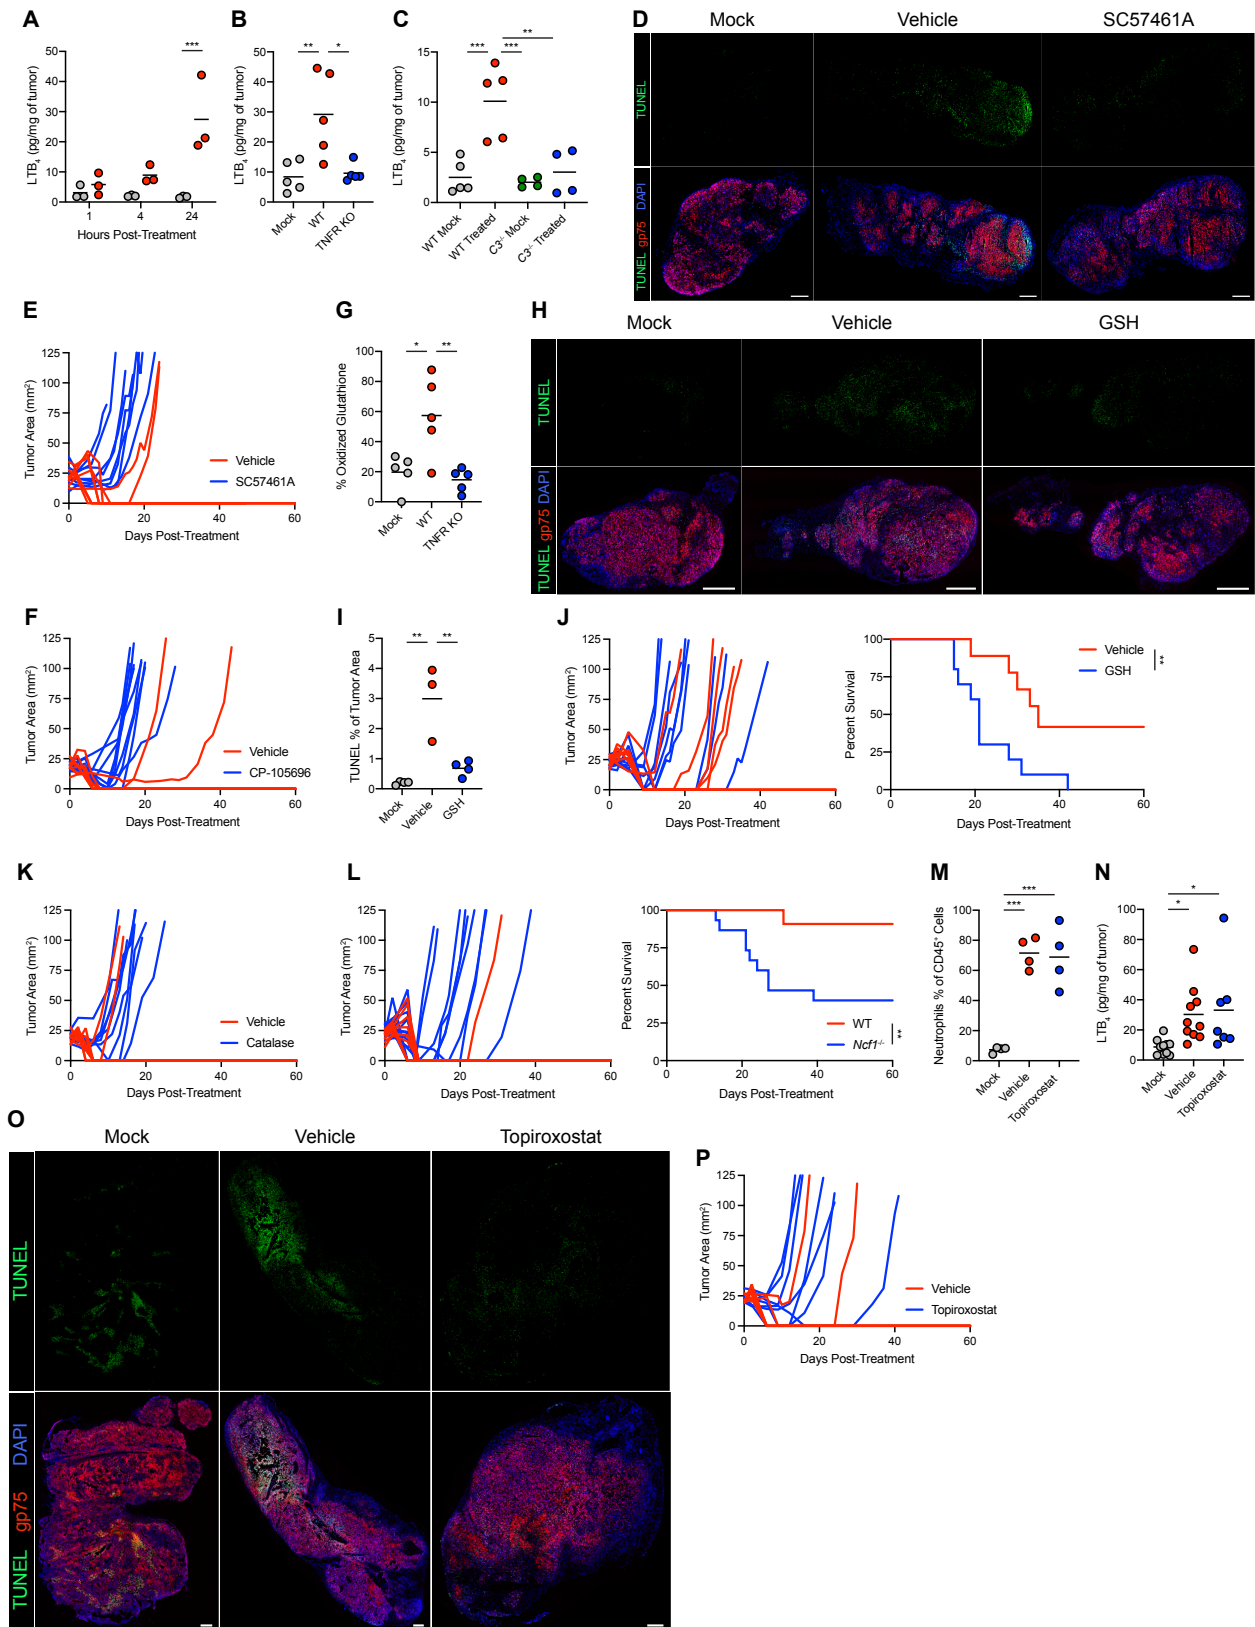

**Figure S8: Xanthine oxidase induces cell death downstream of neutrophil infiltration and secretion of LTB<sub>4</sub>. Related to Figures 5 and 6.**



**(A)** LTB<sub>4</sub> levels in B16 tumors following treatment with neutrophil-activating therapy (n=3). **(B)** LTB<sub>4</sub> levels in B16 tumors 24 hours after treatment of WT or TNFR KO mice with neutrophil-activating therapy (n=5). **(C)** LTB<sub>4</sub> levels in B16 tumors 24 hours after treatment of WT or C3<sup>-/-</sup> mice with neutrophil-activating therapy (WT n=5, C3<sup>-/-</sup> n=4). **(D)** Representative TUNEL immunofluorescence in B16 tumors 24 hours after treatment following administration of the LTA<sub>4</sub>H inhibitor SC57461A. Scale bars = 500 μm. **(E-F)** Growth of B16 in mice administered SC57461A (E) (vehicle n=9, SC57461A n=8) or the BLT1 antagonist CP-105696 (F) (vehicle n=9, CP-105696 n=10) prior to treatment with neutrophil-activating therapy. **(G)** Oxidized glutathione percentage of total glutathione in B16 lysates 24 hours after neutrophil-activating therapy in WT or TNFR KO mice (n=5). **(H-I)** Representative immunofluorescence (H) and quantification (I) of TUNEL staining in B16 tumors 24 hours after treatment following GSH administration. Scale bars = 500 μm. (vehicle n=3, others n=4) **(J)** Tumor growth and survival of B16-bearing mice treated following administration of GSH (vehicle n=9, GSH n=10). **(K)** Growth of B16 in mice administered catalase during treatment with neutrophil-activating therapy (n=9). **(L)** Tumor growth and survival of B16-bearing WT or *Ncf1*<sup>-/-</sup> mice following treatment with neutrophil-activating therapy (WT n=11, *Ncf1*<sup>-/-</sup> n=15). **(M)** Frequency of neutrophils in B16 tumors 24 hours after treatment with neutrophil-activating therapy following topiroxostat administration (n=4). **(N)** LTB<sub>4</sub> levels in B16 tumors 24 hours after neutrophil-activating therapy following topiroxostat administration (topiroxostat n=7, others n=10). **(O)** Representative TUNEL immunofluorescence in B16 tumors 24 hours after treatment with neutrophil-activating therapy following administration of topiroxostat. Scale bars = 500 μm. **(P)** Growth of B16 in mice administered topiroxostat during treatment with neutrophil-activating therapy (vehicle n=9, topiroxostat n=8). Statistics: Two-way ANOVA with Tukey's multiple comparisons test (A), One-way ANOVA with Tukey's multiple comparisons test (B-C, G, I, M-N), Log-rank test (J, L). For all dot plots, the line indicates the mean. Data are representative of 2 (B, G, J, M, P) or 1 (A, C-D, H-I, O) independent experiments or pooled from 2 experiments (E-F, K-L, N).

## Supplemental Table

**Table S1: Oligonucleotide sequences, Related to STAR Methods**

| Name            | Sequence                                                                                                                                                                                                                                                                                                                                                                                                                                                                                                                                                                                                                                                                                                                                                                                                                                                                                                                                                                                                                                                                                                               | Source                                                   | Identifier |
|-----------------|------------------------------------------------------------------------------------------------------------------------------------------------------------------------------------------------------------------------------------------------------------------------------------------------------------------------------------------------------------------------------------------------------------------------------------------------------------------------------------------------------------------------------------------------------------------------------------------------------------------------------------------------------------------------------------------------------------------------------------------------------------------------------------------------------------------------------------------------------------------------------------------------------------------------------------------------------------------------------------------------------------------------------------------------------------------------------------------------------------------------|----------------------------------------------------------|------------|
| Tnfrsf1a sgRNA1 | AGACCTAGCAAGATAACCAG                                                                                                                                                                                                                                                                                                                                                                                                                                                                                                                                                                                                                                                                                                                                                                                                                                                                                                                                                                                                                                                                                                   | Doench et al., 2016                                      | N/A        |
| Tnfrsf1a sgRNA2 | GATGGGGATACATCCATCAG                                                                                                                                                                                                                                                                                                                                                                                                                                                                                                                                                                                                                                                                                                                                                                                                                                                                                                                                                                                                                                                                                                   | Doench et al., 2016                                      | N/A        |
| Surface EGFP    | ATAGCAGGATCCGCCGCCACCATGGAGACCGAT<br>ACCCTCCTGCTGTGGGTTCTCCTGCTGTGGGT<br>GCCTGGCTCCACCGGTGATATGGTTAGCAAGG<br>GCGAAGAGCTCTTTACTGGCGTCGTGCCAATAC<br>TCGTTCGAGCTGGATGGGGACGTTAATGGCCATA<br>AATTCAGCGTGAGCGGCGAGGGGGAGGGGGA<br>CGCCACCTACGGAAAGCTTACTTTGAAGTTTATT<br>TGCCTACAGGCAAGTTGCCTGTGCCTTGGCCT<br>ACACTCGTGACCACACTCACTTACGGGGTGCAG<br>TGTTTTTCTAGGTATCCTGATCACATGAAACAGC<br>ACGACTTTTTCAAGAGCGCAATGCCTGAAGGCTA<br>CGTCCAGGAGAGAACCATATTTTTCAAGGATGAT<br>GGTAACACTACAAAAGTAGAGCTGAAGTCAAGTTTG<br>AGGGGGACACCCTCGTGAACAGAATTGAATTGA<br>AAGGCATTGATTTCAAGGAGGACGGAAACATTCT<br>CGGACACAAAAGTGAATATAATTACAATAGTCATA<br>ACGTCTATATCATGGCAGATAAGCAGAAGAACGG<br>GATTAAGTCAATTTCAAATCAGACACAATATCG<br>AGGATGGCTCCGTTCAACTGGCTGATCATTATCA<br>ACAGAACACCCCTATCGGCGACGGACCTGTTTT<br>GCTCCCTGACAATCACTACTTGTCTACCCAGTCC<br>GCTCTCAGCAAAGACCCCAACGAAAAGCGCGAT<br>CACATGGTTCTGCTGGAGTTCGTGACAGCCGCA<br>GGCATAACACTGGGGATGGACGAGCTTTACAAG<br>AATTCTATGGGAGGAGATAGTCAGGAGGTGACC<br>GTCGTGCCTCACTCCCTGCCCTTTAAGGTGGTC<br>GTTATCTCAGCTATACTTGCCCTTGTGGTTTTGA<br>CTGTTATATCCCTGATTATCCTCATCATGCTGTG<br>GCAGAAAAGCCCCGGTAATCTAGAAGTTCGT | Synthesized by<br>GeneArt,<br>ThermoFisher<br>Scientific | N/A        |
